# Supplementary material
Source: publisher figshare collection journal article supplement (https://springernature.figshare.com/ndownloader/files/21077244)
Supplement: Supplementary file 1 [file 21077244]

# **Table S1:** Context 1 – Aviary. Top-ranked models from the generalized linear mixed models examining factors influencing the behavioural categories locomotion, foraging and maintenance behaviour. The individual identity and the day were fitted as random factors. ∆AICc = differences of the second order Akaike’s Information Criterion between the best model and the other top-ranked models, logLik = log-likelihood.

| Response variable | Model | ΔAICc | logLik | Akaike weight |
| --- | --- | --- | --- | --- |
| Locomotion | **Age class** | **0** | **558.86** | **0.40** |
|  | **Age class+Pre/Post-catching** | **0.69** | **559.56** | **0.28** |
|  | **Age class+Daytime** | **1.81** | **559.00** | **0.16** |
|  | **Age class+Sex** | **1.92** | **558.94** | **0.15** |
| Foraging | **Age class+Daytime+Sex** | **0.00** | **-179.82** | **0.18** |
|  | **Age class+Daytime** | **0.14** | **-180.93** | **0.17** |
|  | **Age class+Daytime+Sex+Pre/Post-catching** | **0.74** | **-179.14** | **0.13** |
|  | **Age class+Daytime+Relative transmitter weight** | **0.82** | **-180.23** | **0.12** |
|  | **Age class+Daytime+Sex+Relative transmitter weight** | **0.85** | **-179.20** | **0.12** |
|  | **Age class+Daytime+Pre/Post-catching** | **0.89** | **-180.27** | **0.12** |
|  | **Age class+Daytime+Pre/Post-catching+Relative transmitter weight** | **1.61** | **-179.58** | **0.08** |
|  | **Age class+Daytime+Sex+Pre/Post-catching+Relative transmitter weight** | **1.63** | **-178.53** | **0.08** |
| Maintenance behaviour | **Daytime+Sex** | **0.00** | **-943.22** | **0.34** |
|  | **Daytime** | **1.28** | **-944.91** | **0.18** |
|  | **Daytime+Sex+Pre/Post-catching** | **1.30** | **-942.82** | **0.18** |
|  | **Daytime+Sex+Relative transmitter weight** | **1.50** | **-942.92** | **0.16** |
|  | **Daytime+Sex+Age class** | **1.84** | **-943.10** | **0.14** |

# **Table S2:** Context 1 – Aviary. Model-averaged coefficients (full-model averaging) with adjusted standard errors (SE), lower and upper limits of the confidence intervals (CI) and the relative importance of the final models explaining the effects on the three behavioural categories, locomotion, foraging and maintenance behaviour.

| Response variable | Coefficients | Estimate | Adjusted SE | CI lower limit (2.5%) | CI upper limit (97.5%) | Relative importance |
| --- | --- | --- | --- | --- | --- | --- |
| Locomotion | Intercept | -2.40 | 0.15 | -2.69 | -2.10 |  |
|  | Age class | 0.61 | 0.12 | 0.37 | 0.84 | 1.00 |
|  | Pre/post-catching | 0.06 | 0.14 | -0.13 | 0.57 | 0.28 |
|  | Daytime | 0.01 | 0.05 | -0.17 | 0.29 | 0.16 |
|  | Sex | 0.01 | 0.05 | -0.19 | 0.28 | 0.15 |
| Foraging | Intercept | -0.95 | 0.31 | -1.56 | -0.34 |  |
|  | Age class | 1.79 | 0.27 | 1.26 | 2.32 | 1.00 |
|  | Sex | 0.19 | 0.27 | -0.13 | 0.89 | 0.41 |
|  | Daytime | 0.55 | 0.26 | 0.04 | 1.05 | 1.00 |
|  | Pre/post-catching | 0.12 | 0.22 | -0.21 | 0.80 | 0.51 |
|  | Relative transmitter weight | -0.05 | 0.11 | -0.34 | 0.09 | 0.40 |
| Maintenance behaviour | Intercept | 2.08 | 0.10 | 1.89 | 2.26 |  |
|  | Sex | -0.14 | 0.11 | -0.36 | 0.01 | 0.82 |
|  | Daytime | 0.25 | 0.09 | 0.07 | 0.43 | 1.00 |
|  | Pre/post-catching | 0.01 | 0.05 | -0.10 | 0.27 | 0.18 |
|  | Relative transmitter weight | 0.00 | 0.02 | -0.11 | 0.05 | 0.16 |
|  | Age class | -0.01 | 0.04 | -0.23 | 0.14 | 0.14 |

For age class, adults were set to zero.

For pre/post-catching, pre-catching was set to zero.

For daytime, before noon was set to zero.

For sex, males were set to zero.
